# Supplementary material
Source: PubMed Central journal article supplement (PMC6779428)
Supplement: supp_RA119.009791_153524_2_supp_377639_pw51hz.pdf [file supp_RA119.009791_153524_2_supp_377639_pw51hz.pdf]

## Supplementary figure legends

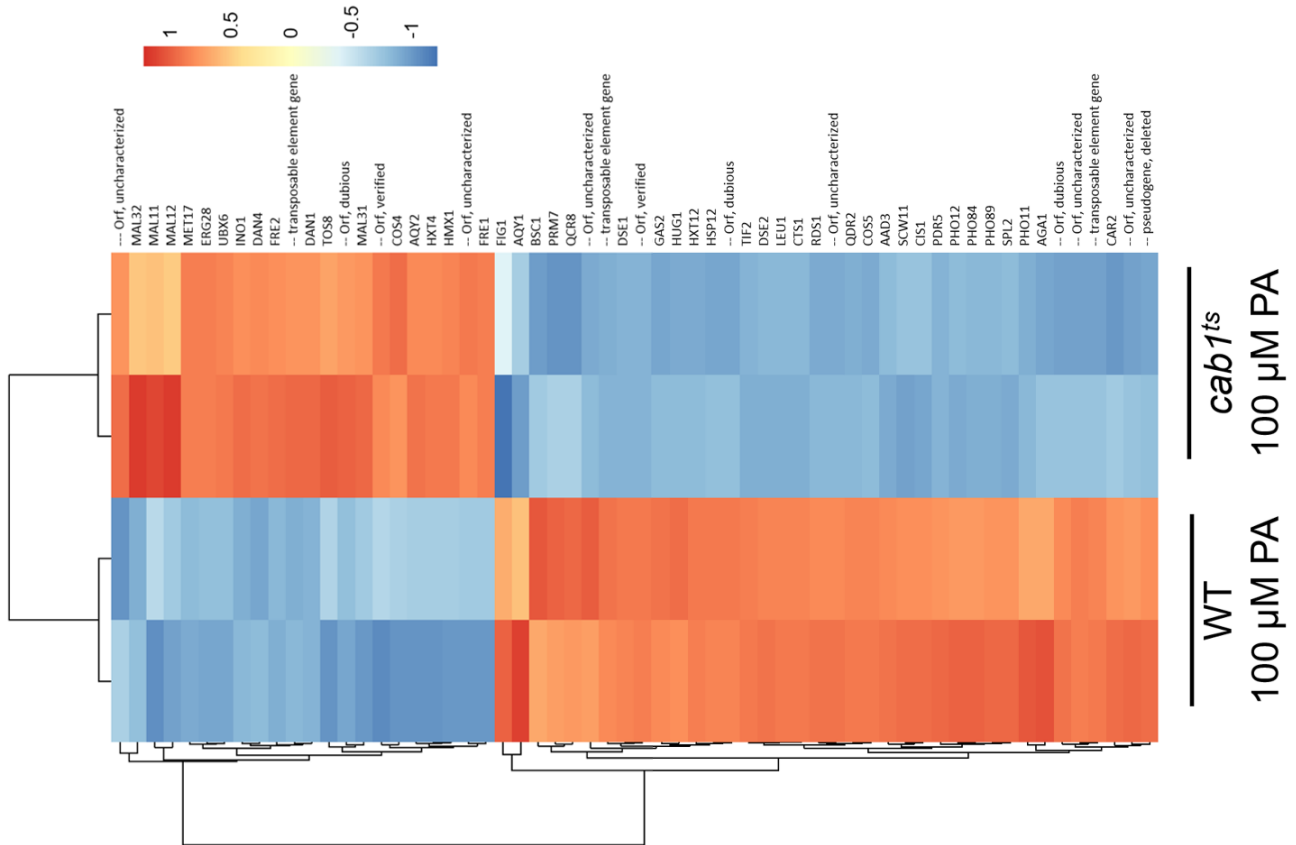

**Fig. S1. Changes in global yeast gene transcription between WT and *cab1<sup>ts</sup>* cells.**

Both strains were grown in minimal media supplemented with 100  $\mu\text{M}$  PA. The two independent replicates of WT cell mRNA are represented by the left two columns, and the two replicates of *cab1<sup>ts</sup>* cell mRNA are represented by the right two columns. Genes were selected as significantly upregulated or downregulated between the WT and *cab1<sup>ts</sup>* strains if q-values were less than 0.05 for the  $\log_2$  change between the two samples. 22

genes were found to be significantly upregulated and 38 genes significantly downregulated in *cab1<sup>ts</sup>* cells compared to wild type cells. It was found that globally, maltose fermentation (*MAL11*, *MAL12*, *MAL31*, *MAL32*) was upregulated in the *cab1<sup>ts</sup>* mutant. Additionally, there was downregulation of phosphate import into the *cab1<sup>ts</sup>* cell (*PHO11*, *PHO12*, *PHO84*, *PHO89*), modulation of amino acid anabolic and catabolic pathways (*MET17*, *LEU1*, *CAR2*), and systematic downregulation of genes of genes transcriptionally regulated by factors involved in pleiotropic drug resistance (*CIS1*, *PDR5*, regulated by transcription factors Pdr1p, Yrr1p).

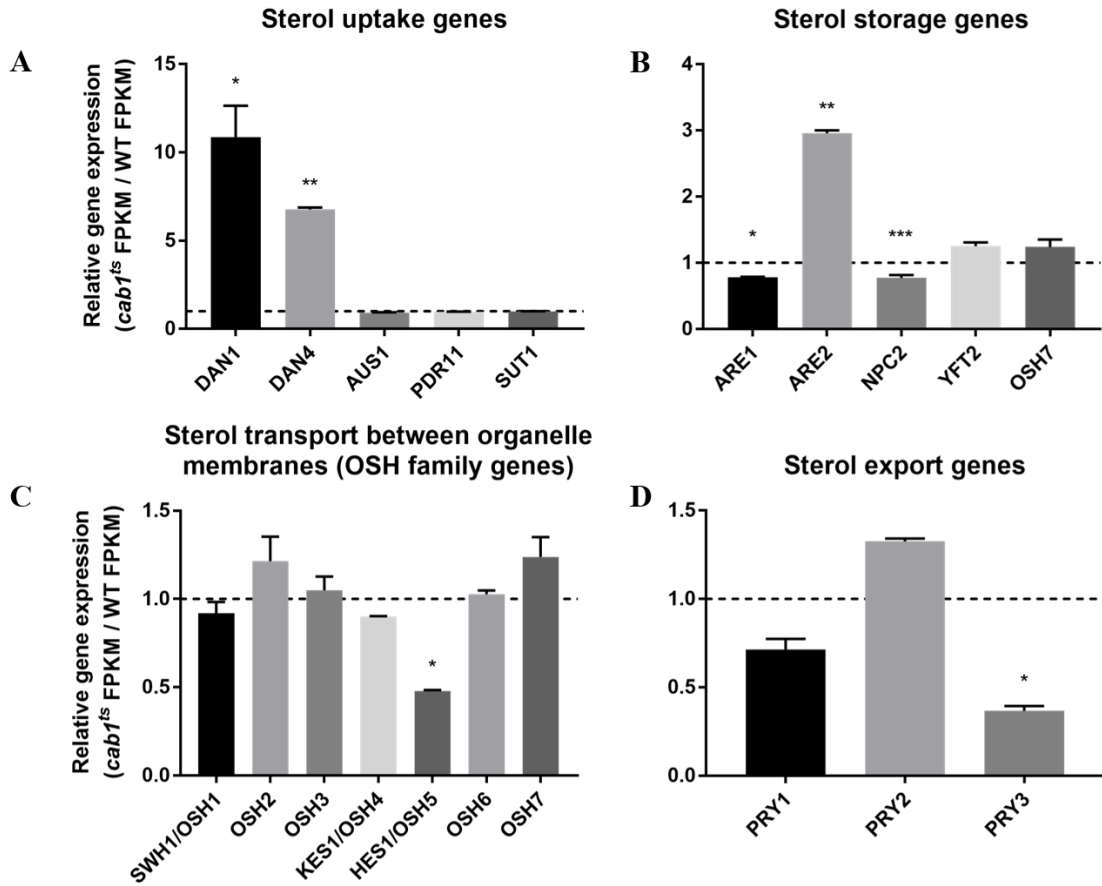

**Fig. S2. Effect of altered pantothenate phosphorylation on genes regulating sterol trafficking.** Fold change of gene expression levels (FPKM) between wild type and *cab1<sup>ts</sup>* strains (n=2) grown in minimal medium supplemented with 100  $\mu$ M PA. For each gene, the level in the wild type was set to 1 to normalize the data. The bars show relative fold change of *cab1<sup>ts</sup>* cells to wild type for each gene. A) Genes regulating sterol uptake. \*p-value 0.0198, \*\*p-value 0.0052. B) Genes regulating sterol storage. \*p-value 0.0266, \*\*p-value 0.0189, \*\*\*p-value 0.0482. C) Genes regulating sterol transport between organelle membranes. \*p-value 0.0195. D) Genes regulating exogenous sterol uptake. \*p-value 0.0085.
